## **Identifying non-identical-by-descent rare variants in population-scale whole genome sequencing data**

Kelsey E. Johnson<sup>1,2</sup> & Benjamin F. Voight<sup>3,4,5</sup>

Author affiliations:

1. Cell and Molecular Biology Graduate Group, Perelman School of Medicine, University of Pennsylvania, Philadelphia, PA, USA
2. Present affiliation: Department of Genetics, Cell Biology and Development, University of Minnesota, Minneapolis, MN, USA
3. Department of Systems Pharmacology and Translational Therapeutics, Perelman School of Medicine, University of Pennsylvania, Philadelphia, PA, USA
4. Department of Genetics, Perelman School of Medicine, University of Pennsylvania, Philadelphia, PA, USA
5. Institute for Translational Medicine and Therapeutics, Perelman School of Medicine, University of Pennsylvania, Philadelphia, PA, USA

### **Correspondence to:**

Benjamin F. Voight, PhD  
Associate Professor of Systems Pharmacology and Translational Therapeutics  
Associate Professor of Genetics  
University of Pennsylvania - Perelman School of Medicine  
3400 Civic Center Boulevard  
10-126 Smilow Center for Translational Research  
Philadelphia, PA 19104  
Email: [bvoight@pennmedicine.upenn.edu](mailto:bvoight@pennmedicine.upenn.edu)

1 **Abstract**

2

3 The site frequency spectrum in human populations is not accurately modeled by an infinite sites model,  
4 which assumes that all mutations are unique. Despite the pervasiveness of recurrent mutations, we lack  
5 computational methods to identify these events at specific sites in population sequencing data. Rare  
6 alleles that are identical-by-descent (IBD) are expected to segregate on a long, shared haplotype  
7 background that descends from a common ancestor. However, alleles introduced by recurrent mutation or  
8 by non-crossover gene conversions are identical-by-state and will have a shorter expected shared  
9 haplotype background. We hypothesized that the expected difference in shared haplotype background  
10 length can distinguish IBD and non-IBD variants in population sequencing data without pedigree  
11 information. We implemented a Bayesian hierarchical model and used Gibbs sampling to estimate the  
12 posterior probability of IBD state for rare variants, using simulations to demonstrate that our approach  
13 accurately distinguishes rare IBD and non-IBD variants. Applying our method to whole genome  
14 sequencing data from 3,621 individuals in the UK10K consortium, we found that non-IBD variants  
15 correlated with higher local mutation rates and genomic features like replication timing. Using a heuristic  
16 to categorize non-IBD variants as gene conversions or recurrent mutations, we found that potential gene  
17 conversions had expected properties such as enriched local GC content. By identifying recurrent  
18 mutations, we can better understand the spectrum of recent mutations in human populations, a source of  
19 genetic variation driving evolution and a key factor in understanding recent demographic history.

## 20 Introduction

21  
22 Recurrent mutations are repeated mutational events at the same nucleotide position in multiple individuals  
23 in a population. The frequency of recurrent mutations and their relevance to evolutionary genetics studies  
24 have been examined since the beginning of the field of population genetics (e.g. Wright 1931; Haldane  
25 1933; Wright 1937). The frequency that a recurrent mutation is observed in a sample depends on many  
26 factors, including the per-base-pair mutation rate, the number of chromosomes surveyed, the effective  
27 population size, as well as the demographic history of the population surveyed. Distinguishing recurrent  
28 mutations from variants whose alleles are all inherited identical-by-descent (IBD) is critical to a complete  
29 understanding of the human germline mutation rate, and to population genetic methods that make  
30 inferences from the observed number and frequency of genetic variants in a population.

31 As the genetics community has surveyed large, rapidly growing populations with a finite genome  
32 size, such as modern humans (Harpak et al. 2016), it has been observed that recurrent mutations occur at  
33 appreciable frequency. For example, in the Exome Aggregation Consortium dataset of 60,706 human  
34 exomes, there is a marked absence of singleton CpG transitions relative to other mutation types (Lek et al.  
35 2016). This observation could be explained by the presence of recurrent mutations saturating these highly  
36 mutable sites in this large sample, resulting in two or more sampled individuals segregating identical-by-  
37 state alleles at CpG sites.

38 One implication of this observation is that the presence of recurrent mutations in a large sample  
39 may result in a suboptimal calibration of summary data typically utilized in population genetic inference,  
40 like the site frequency spectrum (SFS). The SFS is the distribution of the number of observed variants at  
41 allele counts 1 to  $n-1$  in a sample of  $n$  chromosomes. Many modern population genetics methods use the  
42 SFS to infer the demographic history of a sample (Gutenkunst et al. 2009; Lukic and Hey 2012; Excoffier  
43 et al. 2013; Bhaskar et al. 2015; Jouganous et al. 2017). These approaches generally assume an infinite  
44 sites model with no recurrent mutations, but the human site frequency spectrum is not well explained by  
45 an infinite sites model (Harpak et al. 2016). Previous work has described the SFS allowing for recurrent  
46 mutations, relying on observed recurrent mutations in the form of triallelic sites (Jenkins and Song 2011;  
47 Jenkins et al. 2014; Ragsdale et al. 2016). If recurrent mutations are not accounted for, the SFS will be  
48 shifted to higher allele frequencies relative to the SFS that incorporated recurrent mutations at lower  
49 frequencies. This could impact the accuracy of demographic parameter inference. In particular, methods  
50 that infer the magnitude of recent population growth, which rely on rare variants, may incur bias if they  
51 do not take recurrent mutations into account. Similarly, the magnitude of purifying selection may be  
52 underestimated if the frequencies of rare variants are overestimated due to undetected recurrent mutation.

53 Finally, estimates of mutation rates from population genetic data that do not incorporate recurrent  
54 mutations may be biased downwards.

55 Beyond population genetic applications, identifying specific recurrent mutations could be useful  
56 in the context of genotype-phenotype association through tests of rare variant burden. Rare variant burden  
57 approaches are increasingly used to associate genomic regions with disease status or quantitative traits in  
58 large-scale sequencing datasets (Nicolae 2016). In general, these approaches test the null hypothesis that  
59 the frequency of rare variants in a genomic region is independent of the phenotype of interest. If a gene is  
60 causal for a trait, we may expect to observe a higher frequency of rare variants, but also more recurrent  
61 variants especially at highly mutable nucleotide positions that have a substantial impact on the trait. If  
62 recurrent mutations could be identified, they could potentially improve power to associate the gene with  
63 the trait. Recurrent mutations have been used in this context in family-based studies, where recurrent  
64 mutations can be identified as *de novo* events in unrelated families (e.g. Kirby et al. 2013; O’Roak et al.  
65 2014). We are not aware of any examples of recurrent mutations being used in large-scale population-  
66 based sequencing studies of rare disease associations.

67 In what follows, we propose a computational approach to infer the presence of a recurrent  
68 mutation at a genomic site. The key idea underlying our approach is to use the genetic variation linked to  
69 rare variants to distinguish alleles at a variant position as identical-by-descent (IBD) or non-IBD. Rare  
70 IBD variants are usually surrounded by a long, shared haplotype on all chromosomes carrying the variant  
71 (i.e., an IBD segment), because all segregating alleles derive from a recent ancestral mutation. If the  
72 variant arose a small number of generations ago, there have been few opportunities for recombination  
73 events to shorten the shared IBD segment. Thus, the length of the IBD segment shared across carriers is  
74 inversely related to the age of the variant (Haldane 1919; Mathieson and McVean 2014). In contrast,  
75 recurrent mutations or gene conversions can occur on any random haplotype background in a population,  
76 and thus we expect that their local time to the most recent common ancestor (TMRCA) will be on average  
77 older than an IBD variant of the same allele frequency.

78 Leveraging the relationship between local TMRCA and the length of a shared IBD segment, we can  
79 identify rare variants that appear non-IBD. However, it is important to consider many potential reasons  
80 why we might observe a short IBD segment around a rare variant. Beyond recurrent mutation, non-  
81 crossover gene conversion, proximity to a region of extremely high local recombination rate, or simply  
82 chance might also explain specific events. In addition, if one or multiple copies of a rare variant are  
83 genotyping errors, this could result in the same signature of a shorter than expected shared IBD segment  
84 between carriers. Thus, any approach that aims to identify recurrent mutations from data must work to  
85 distinguish amongst these types of events.

86 We propose to identify rare variants that fall on the extreme short end of shared IBD segment lengths  
87 and attempt to categorize these likely non-IBD variants by the possibilities enumerated above. In addition  
88 to the IBD segment length, additional genomic annotations can help to distinguish between these causes,  
89 such as the mutation's sequence context (e.g. a CpG mutation), the local recombination rate, and local GC  
90 content.

91 While previous efforts have leveraged IBD tracts to infer mutation and gene conversion rates  
92 (Palamara et al. 2015), as well as to estimate allele ages (Palamara et al. 2012; Mathieson and McVean  
93 2014; Platt et al. 2019; Albers and McVean 2020), we are not aware of any previous method designed to  
94 specifically identify recurrent mutations and gene conversion events at specific genomic positions at  
95 genome-wide scale. In today's era of whole genome sequencing of thousands of individuals from a  
96 population, categorizing specific rare variants as likely recurrent mutations or gene conversions is now  
97 uniquely possible. Here, we describe a Bayesian hierarchical model to identify non-IBD rare variants,  
98 using population genetic simulations to assess its precision and accuracy. We then apply our approach to  
99 sequencing data of 3,621 individuals from the UK10K dataset, and partition high-confidence non-IBD  
100 rare variants as those likely to be recurrent mutations or gene conversions.

101

## 102 **New Approaches**

103

### 104 **Theory**

105 Previous work to model the expected TMRCA between two IBD alleles or two random alleles in a  
106 population provides a framework through which these states can be distinguished in data. Measuring the  
107 accumulation of mutations on a haplotype, *i.e.*, the mutational clock, is useful for estimating the age of  
108 older, common variants; however, for our purpose here to distinguish rare recurrent and IBD variants,  
109 there will be few if any linked mutations more recent than the focal variant. Therefore, the mutational  
110 clock does not help us distinguish IBD and non-IBD rare alleles, and we rely solely on the recombination  
111 clock for inference.

112 The theoretical distributions of the pairwise TMRCA for IBD or non-IBD alleles for a range of  
113 allele counts are plotted in **Supplementary Figure 1 (Supplementary Methods)**. As the IBD allele  
114 count increases, the mean TMRCA also increases, reflecting that higher frequency alleles tend to be  
115 older; meanwhile, the TMRCA distribution between non-IBD allele pairs is unchanging because it is not  
116 a function of the allele frequency. Thus, the difference between the expected TMRCA for IBD vs. non-  
117 IBD variants increases with decreasing allele frequency.

118 Though the TMRCA of a genetic variant is not directly observable, it can be estimated by the  
119 length of the haplotype shared by carriers of the variant. The distance to the nearest recombination event

120 on either side of a genetic variant between a pair of alleles can be modeled as exponentially distributed  
121 with rate proportional to the TMRCA (Palamara et al. 2012; Mathieson and McVean 2014). The expected  
122 difference in the TMRCA between a rare variant segregating with IBD alleles and a variant position with  
123 recurrent mutations (**Supplementary Figure 1**) translates into IBD variants having, on average, longer  
124 pairwise distances to obligate recombination events compared to recurrent sites of the same allele  
125 frequency (**Supplementary Figure 2**). Recent methods have inferred the age of alleles in large-scale  
126 population datasets by leveraging this relationship between haplotype background and the TMRCA  
127 (Palamara et al. 2012; Platt et al. 2019; Albers and McVean 2020), and by constructing local genealogies  
128 (Kelleher et al. 2019; Speidel et al. 2019). However, these tools assume an infinite sites model (*i.e.*, no  
129 recurrent mutations), and do not explicitly attempt to identify recurrent mutations. Existing approaches to  
130 identify recurrent mutations rely on family relationships, or assume that variants present at very rare  
131 frequencies in distantly related populations are recurrent without explicitly identifying variants as non-  
132 IBD (e.g. Pagnier et al. 1984; The 1000 Genomes Project Consortium 2012). Thus, our goal was to  
133 develop an approach to identify non-IBD variants that scales to large, whole genome population  
134 sequencing studies with thousands of individuals.

135 While recombination breakpoints cannot be directly observed in population sequencing data,  
136 patterns of genetic variation can give us an estimate of the location of these events. Here, we are  
137 interested in rare genetic variants that are difficult to accurately phase. Additionally, the signature of  
138 recurrent mutation itself could introduce error into statistical phasing algorithms. Thus, our method  
139 utilizes unphased diploid genotypes to estimate the recombination distances on either side of a pair of  
140 alleles. With diploid genotypes for a pair of individuals each carrying a focal allele, one can measure the  
141 obligate recombination distance as the physical span to the first opposite homozygote genotype between  
142 the two individuals (**Supplementary Figure 3**). No genealogy without recombination is compatible with  
143 the observed genotypes of these two sites (the focal allele and the site of the opposite homozygote  
144 genotypes), and so we assume a recombination event has occurred between them (Mathieson and  
145 McVean 2014). Thus, the obligate recombination distance gives an estimate of the true recombination  
146 distance.

147

## 148 **Statistical Model**

149 We considered a Bayesian hierarchical model for the pairwise recombination distances from a sample of  
150 variants of a given allele count, which allowed us to learn the model parameters directly from the data  
151 (**Figure 1**). We modeled the sampled variants as a finite mixture of IBD ( $k=1$ ) or non-IBD ( $k>1$ , with  
152 each possible partition of alleles for a non-IBD variant given a different value of  $k$ ), with mixture  
153 proportions  $\pi_k$ . For example, a non-IBD variant of allele count 4 has two possible partitions: a singleton

154 and an IBD tripleton (1:3), or two doubletons (2:2). Each variant of allele count  $A$  has  $n = \binom{A}{2}$  allele  
155 pairs. The TMRCA ( $t$ ) for an allele pair was sampled from a gamma distribution with shape  $\alpha$  and rate  $\beta$ ,  
156 with one gamma distribution of  $t$  for IBD allele pairs and one for non-IBD allele pairs, For non-IBD allele  
157 pairs, we estimated  $\alpha$  and  $\beta$  from multiallelic sites, and for IBD allele pairs we fixed  $\alpha$  and performed  
158 sampling for  $\beta$ , over a range of possible values for  $\alpha$ . For each variant, the possible permutations of allele  
159 pair assignments of IBD or non-IBD states are denoted by  $j$ . For IBD variants, all allele pairs are IBD; for  
160 non-IBD variants, the possibilities depend on the partition  $k$ . We modeled the left and right recombination  
161 distances ( $d_L, d_R$ ) for each allele pair following an exponential distribution with rate proportional to  $t$ . We  
162 used Gibbs sampling to sample from the marginal posterior density of each parameter, as we could  
163 estimate these densities from the full conditional distributions. Below we outline these expressions.

164 **Mixture proportions ( $\pi$ ):** Using a multinomial likelihood for the probability of the assignments  $k$  based  
165 on proportions  $\pi$ , we used the conjugate prior Dirichlet distribution to get a Dirichlet posterior for the  
166 probabilities of  $\pi$  given the observed  $k$  assignments. Thus we have the likelihood function:

$$k|\pi \sim \text{Multinomial}(1, \pi) \quad (1)$$

167 We used a Dirichlet prior for  $\pi$ :

$$\pi \sim \text{Dirichlet}(\delta) \quad (2)$$

168  
169 The resulting posterior probability followed a Dirichlet distribution:

$$\pi|k \propto \text{Dirichlet}\left(\delta + \sum_{i=1}^n (k = k_i)\right) \quad (3)$$

170  
171 **TMRCA ( $t$ ):** The likelihood of the pairwise recombination distance  $d$  to one side of a variant (in  
172 centiMorgans), given TMRCA  $t$ , followed an exponential distribution (Palamara et al. 2012):

$$d|t \sim \text{Exp}\left(\frac{t}{50}\right) \quad (4)$$

173  
174 We used a gamma prior for  $t$ :

$$t|\alpha, \beta \sim \Gamma(\alpha, \beta) \quad (5)$$

175  
176 The resulting posterior distribution was another gamma distribution:

$$t|d \propto \Gamma\left(\alpha + n, \beta + \frac{\sum_{i=1}^n d_i}{50}\right) \quad (6)$$

177

178 **Shape ( $\alpha$ ) and rate ( $\beta$ ) of the TMRCA distribution:** We modeled the distribution of  $t$  as a gamma  
 179 distribution with shape  $\alpha$  and rate  $\beta$ :

$$t | \alpha, \beta \sim \Gamma(\alpha, \beta) \quad (7)$$

180  
 181 We used the conjugate priors for a gamma distribution rate parameter ( $\beta$ ) with known shape ( $\alpha$ ), a second  
 182 gamma distribution:

$$\beta \sim \Gamma(\alpha_0, \beta_0) \quad (8)$$

183  
 184 The posterior for  $\beta$  then also follows a gamma distribution:

$$\beta | t, \alpha \sim \Gamma\left(\alpha_0 + n\alpha, \beta_0 + \sum_{i=1}^n t_i\right) \quad (9)$$

185  
 186 **Full conditional distributions:** To sample from the posterior for each unknown parameter, we derived the  
 187 full conditional distributions below, ignoring conditionally independent terms. In each iteration of the  
 188 Gibbs sampler, we sample each parameter from its full conditional distribution, conditioned on the current  
 189 values of all other parameters. The sampling algorithm is described in the **Supplementary Methods**.

190  
 191  $\pi$ , mixture proportions of  $k$ :

$$f(\pi | d, k, j, t, \alpha, \beta, \alpha_0, \beta_0) = f(\pi | k) \propto f(k | \pi) f(\pi) = \text{Dirichlet}\left(\delta_k + \sum_{i=1}^n (k_i = k)\right) \quad (10)$$

192  
 193  $\beta$ , rate parameter of TMRCA distributions:

$$f(\beta | d, k, j, t, \pi, \alpha, \alpha_0, \beta_0) = f(\beta | t, \alpha, \alpha_0, \beta_0) \propto \Gamma\left(\alpha_0 + n\alpha, \beta_0 + \sum_{i=1}^n t_i\right) \quad (11)$$

194  
 195  $t$ , TMRCA:

$$f(t | d, k, j, \pi, \alpha, \beta, \alpha_0, \beta_0) = f(t | d, \alpha, \beta) \propto f(d | t) f(t | \alpha, \beta) = \text{Exp}\left(d; \frac{t}{50}\right) \Gamma(t; \alpha, \beta) \quad (12)$$

196  
 197  $k$ , variant label (IBD or non-IBD partition):

$$\begin{aligned} f(k | d, j, t, \pi, \alpha, \beta, \alpha_0, \beta_0) &\propto f(d, j, t, \pi, \alpha, \beta, \alpha_0, \beta_0 | k) f(k) = f(d | t, j, k) f(t | \alpha, \beta) f(k) \\ &= \text{Exp}\left(d; \frac{t}{50}\right) \Gamma(t; \alpha, \beta) \pi_k \end{aligned} \quad (13)$$

198



199  $j$ , the partition of non-IBD variants:

$$\begin{aligned} f(j|d, k, t, \pi, \alpha, \beta, \alpha_0, \beta_0) &\propto f(d, k, t, \pi, \alpha, \beta, \alpha_0, \beta_0|j)f(j) \propto f(d|t, j, k)f(t|\alpha_j, \beta_j) \\ &= \text{Exp}\left(d; \frac{t_j}{50}\right) \Gamma(t_j; \alpha_j, \beta_j) \end{aligned} \quad (14)$$

200

## 201 Results

202

### 203 **Application to simulated genetic data**

204 To evaluate our approach, we applied it to simulated genetic data including non-IBD (recurrent)  
205 mutations. Using the forward genetic simulation engine SLiM (Haller and Messer 2017), we generated  
206 genomic segments of length 10Mb with uniform mutation and recombination rates ( $\mu = 2.5 \times 10^{-8}$   
207 mutations per site per generation,  $r = 1 \times 10^{-8}$  events per site per generation), and no selection, following a  
208 European demographic model (Bhaskar et al. 2015). For each simulation, we measured the pairwise  
209 obligate recombination distances of recurrent and IBD variants with allele count  $\leq 10$  in the 2Mb at the  
210 center of each genomic segment. The number of recurrent mutations in these simulations is plotted in  
211 **Supplementary Figure 4**.

212 We applied our Bayesian hierarchical model to the obligate recombination distances from these  
213 simulations, and calculated the posterior probability of a variant being non-IBD as the fraction of  
214 posterior samples with  $k > 1$  (**Supplementary Figure 5**). We then evaluated the ability of this posterior  
215 estimate to distinguish the IBD and recurrent variants from their obligate recombination distances. The  
216 receiver operating characteristic (ROC) curves in **Figure 2** show the relationship between true and false  
217 positive rates for allele counts 2-10. The precision and recall of our approach depends on the fraction of  
218 variants that are non-IBD (**Figure 2**), with higher recurrent fractions having superior performance.

219 We next performed a battery of sensitivity studies, simulating population genomics features  
220 known to influence patterns of genetic variation that may impact the robustness of our estimates. First, we  
221 performed simulations of genomic segments including genes and deleterious mutations, and applied our  
222 approach to these simulations to test the effect of selection on our approach to identify non-IBD variants  
223 (**Methods**). We found that including background selection had little impact on the power of our approach  
224 to identify recurrent mutations (**Supplementary Figure 6; Supplementary Table 1**). We suspect that  
225 this may be due to the fact that the rare variants we are interested in are largely quite new  
226 (**Supplementary Figure 7**); thus, the difference in recombination distance between IBD and recurrent  
227 variants in these simulations is not strongly altered by the presence of weak negative selection.

228 Next, we evaluated the performance of our approach for simulated variants flanked by 10,000  
229 base pair recombination hotspots, with hotspot recombination rates of  $5 \times 10^{-6}$ ,  $1 \times 10^{-6}$ , or  $5 \times 10^{-7}$  events per

230 base pair per generation (**Methods**). For variants close to a hotspot, we expected a smaller difference  
231 between recurrent and IBD allele pairs' recombination distances, due to a weaker relationship between  
232 recombination distance and TMRCA. When we applied our Bayesian hierarchical model to the  
233 simulations with hotspots, we found that our power to distinguish IBD and recurrent variants decreased  
234 with increased hotspot strength (**Supplementary Figure 8; Supplementary Table 1**).

235

### 236 **Comparison to other approaches to identify non-IBD variants**

237 To provide alternative approaches for comparison and benchmarking purposes, we developed a  
238 composite-likelihood approach to identify non-IBD allele pairs, based on coalescent theory of the  
239 TMRCA for IBD or recurrent allele pairs in an exponentially growing population (**Supplementary**  
240 **Methods**). While the likelihood-based approach had some power to classify events, this approach  
241 performed less well than the Bayesian hierarchical model (**Supplementary Figure 9, Supplementary**  
242 **Table 2**). For allele counts  $<7$ , the likelihood-based approach had substantially worse power at the lowest  
243 false positive rates, the relevant range for identifying non-IBD variants.

244 While no genome-wide scalable approach to identify specific non-IBD variants exists to our  
245 knowledge, there are recently developed methods that estimate the age of a variant in large scale genome-  
246 wide sequencing data (Platt et al. 2019; Albers and McVean 2020). Non-IBD mutations could potentially  
247 be identified as outliers in the age estimates of each allele frequency class by these approaches. We  
248 estimated simulated variants' ages using the estimator *runtc* (Platt et al. 2019) (**Methods**). We used these  
249 age estimates to distinguish simulated IBD and recurrent variants, and plot the performance of this  
250 approach in **Supplementary Figure 10**. We find that the age estimates have limited power to distinguish  
251 non-IBD variants, and that *runtc*'s performance at this task – a task we note that it was not explicitly  
252 designed for – performs poorly compared to our Bayesian hierarchical approach (**Supplementary Table**  
253 **2**).

254

### 255 **Application of Bayesian hierarchical model to UK10K sequencing data**

256 We applied our method to identify non-IBD variants in whole-genome sequencing data in 3,621  
257 individuals from the UK10K project (Walter et al. 2015). Individuals from the ALSPAC and TWINSUK  
258 studies used here were sequenced to average depth  $\sim 7x$  and passed the UK10K project quality control  
259 filters. We measured the obligate recombination distance for biallelic and multiallelic single nucleotide  
260 variants that passed the UK10K quality filters. Based on the decreased performance of our method with  
261 increased allele count, we restricted our analysis to variants of allele count less than or equal to 5.

262 We applied our approach to a mixture of 80% biallelic and 20% multiallelic sites, in order to use  
263 multiallelic sites as a positive control for non-IBD mutations. We compared the empirical cumulative

264 distribution of posterior probabilities for multiallelic and biallelic sites, and as expected we observed that  
265 multiallelic sites had higher posterior probabilities of being non-IBD (**Supplementary Figure 11**). We  
266 used these distributions to determine the threshold of posterior probabilities we called “likely non-IBD”  
267 for all biallelic variants at allele counts 2-5, which we then used in downstream analyses.

268

### 269 **Non-IBD variants correlate with local sequence context**

270 To assess the accuracy of our recurrent mutation calls, we took advantage of the relationship between  
271 local sequence context and mutation rate (Aggarwala and Voight 2016). Under a Poisson model of  
272 mutation, sequence contexts with a higher mutation rate should have a higher probability of recurrent  
273 mutation relative to other contexts (i.e., “double hits”). If non-IBD variant calls reflect recurrent  
274 mutations, we would expect to see a correlation between the fraction of non-IBD variants and the  
275 mutability of sequence contexts. Conversely, if our approach randomly selects a subset of sites rather than  
276 true recurrent mutations, we would not expect to see a relationship between sequence context and fraction  
277 of sites called recurrent. Using sequence-context estimated polymorphism probabilities calculated from  
278 the UK10K dataset, we calculated an expected fraction of recurrent variants for each 5 base-pair (5-mer)  
279 sequence context and allele count (**Methods**).

280 Across all 5-mer sequence contexts, we observed a significant correlation between expected and  
281 observed fractions (e.g. Pearson’s correlation = 0.81,  $P < 10^{-100}$  for allele count 2; **Figure 3**;  
282 **Supplementary Table 3**). The observed fraction of non-IBD called sites was higher than expected for  
283 non-CpG->T contexts, and lower than expected for CpG->T contexts (**Figure 3**; **Supplementary Table**  
284 **4**). Within CpG->T contexts, we also observed a significant correlation between expected and observed  
285 fractions, though for all contexts the observed fraction of non-IBD calls was less than expected  
286 (**Supplementary Figure 12**; **Supplementary Table 4**). Within non-CpG->T contexts, the correlation  
287 between expected and observed was significant for all allele counts except for variants of allele count 5,  
288 which have the smallest sample size (**Supplementary Figure 13**; **Supplementary Table 4**). These  
289 results suggest that at sequence contexts with relatively lower polymorphism probabilities, there was a  
290 higher rate of non-IBD calls. Non-CpG->T contexts represent 82% of the polymorphic sites tested, but  
291 68% of sites called non-IBD.

292

### 293 **Additional genomic annotations correlated with non-IBD variants**

294 Next, to understand which genomic features in addition to local mutation rate are associated with non-  
295 IBD variants, we performed a linear regression with the posterior probability of each variant being non-  
296 IBD as the response variable (6,763,324 sites; with 665,340 called non-IBD). In separate regressions for  
297 each allele count, we included 7-mer polymorphism probabilities, background selection, GC content,

298 replication timing, local recombination rate, distance to a recombination hotspot, germline CpG  
299 methylation levels, the variant calling quality measure VQSLOD, and read depth as predictor variables.  
300 We transformed the values of each annotation to z-scores, and report the odds ratios and 95% confidence  
301 interval for each annotation in **Figure 4 (Supplementary Table 5)**. All annotations were significantly  
302 associated with the outcome ( $P < 1 \times 10^{-10}$ ). In addition, we performed a logistic regression with IBD/non-  
303 IBD calls for each variant as the response variable (**Supplementary Figure 14; Supplementary Table**  
304 **5**). We also performed regressions with CpG->T sites only (**Supplementary Figure 15, Supplementary**  
305 **Table 5**). Below, we highlight the annotations included as predictors, our prior hypotheses about their  
306 relationships with recurrent mutations, and the results of the regression models.

307  
308 **Polymorphism probability:** As shown in our analysis of expected vs. observed recurrent fraction for 5-  
309 mer sequence contexts above, polymorphism probability was strongly positively correlated with non-IBD  
310 status. As previous work has shown that a 7-mer model explains additional variation in genetic variation  
311 over a 5-mer model (Aggarwala and Voight 2016), we find that a 7-mer polymorphism probability  
312 calculated in UK10K in the logistic regression model was associated with our non-IBD calls.

313 **GC content:** GC content varies across the human genome, and is correlated with gene content, repetitive  
314 elements, DNA methylation, recombination rates, and substitution probabilities (Arndt et al. 2005). In our  
315 regression model, increased local GC content (measured at a 1kb scale) was associated with increased  
316 probability of a variant being called non-IBD.

317 **Replication timing:** Later replication timing has been linked to higher rates of de novo mutations in the  
318 human genome, specifically in the offspring of relatively younger fathers (Francioli et al. 2015). Our  
319 regression model with replication timing estimates (Koren et al. 2012) was consistent with these results,  
320 with variants in late replicating regions significantly more likely to be called as recurrent (positive  
321 replication timing values mean earlier replication).

322 **Background selection:** We included B-values (McVicker et al. 2009), a measure of background selection,  
323 or purifying selection due to linkage with deleterious alleles. Lower B-values indicate a lower fraction of  
324 neutral variation in a region, i.e., stronger background selection. We expected that increased background  
325 selection would be associated with increased recurrent mutation, as linkage to deleterious alleles would  
326 result in variants being removed from the population and thus present at lower frequencies. Recurrent  
327 mutations would then be more likely to be present as they effectively shift the site frequency spectrum  
328 towards more rare alleles. Our results are consistent with this expectation, with an odds ratio less than one  
329 for B-values.

330 **Local recombination rate and distance to recombination hotspots:** The results of our simulations  
331 suggested that we have lower power to identify recurrent variants located near a recombination hotspot

332 **(Supplementary Figures 8, 9)**. Indeed, we observed that both an increased local recombination rate and a  
333 shorter distance to a recombination hotspot were correlated with a lower probability of a site being called  
334 as recurrent.

335 ***Methylation levels at CpG sites***: Spontaneous deamination of 5-methylcytosine at CpG sites results in a  
336 substantial increase in C-to-T transition mutations. We included CpG methylation levels measured in  
337 testes and ovaries in our model, expecting that CpG sites with higher methylation levels are more likely to  
338 spontaneously deaminate, increasing mutation rates generally and thus increase recurrent mutation  
339 probabilities. Methylation levels in testes and ovaries were correlated (Pearson's correlation coefficient =  
340 0.27,  $P < 2 \times 10^{-16}$ ), but we noted that increased methylation in both tissue types independently predicted an  
341 increased posterior probability of a variant being non-IBD.

342 ***VQSLOD and read depth***: We observed a significant relationship between sequencing quality, measured  
343 both by read depth and variant quality score, and the probability of a site being non-IBD. Under a simple  
344 model for genotyping error, where errors are distributed randomly (without respect to haplotype), this  
345 result suggests that our approach also identifies some number of genotyping errors in regions of low read  
346 depth or sequencing quality.

347

#### 348 **Non-IBD calls and gene conversion events**

349 As non-crossover gene conversions are thought to be more frequent than de novo mutations in the human  
350 genome (Halldorsson et al. 2016), we expect that a subset of our non-IBD variant calls reflect gene  
351 conversion events. After a non-crossover gene conversion event encompassing a rare variant, the copied  
352 allele resides on the existing haplotype background of the acceptor chromosome, which may reduce the  
353 surrounding shared IBD segment. We devised a heuristic to identify likely gene conversions, based on the  
354 intuition that two non-IBD variants in close physical proximity in the same individuals are more likely to  
355 reflect variants copied along a gene conversion tract, rather than two independent recurrent point  
356 mutations. If a gene conversion tract contains only a single rare variant, this signature would be  
357 indistinguishable from a recurrent point mutation with our approach. Furthermore, if a gene conversion  
358 contained no rare variants, it would not be identified in our analysis as a potential recurrent mutation or  
359 gene conversion.

360 Limiting our results to tracts less than 1kb with 2 or more non-IBD variants present in the same  
361 individuals, we identified 42,203 variants within 18,971 putative gene conversion tracts, representing  
362 6.3% of non-IBD variants (**Supplementary Figure 16**). We performed logistic regression with all non-  
363 IBD variants labeled as potential gene conversions or not as the outcome, and the genomic annotations  
364 listed above as predictor variables (**Figure 5, Supplementary Table 6**). We additionally included the  
365 posterior probability of a variant being non-IBD as a predictor variable. Compared to non-IBD variants

366 not in putative gene conversion tracts, these variants were associated with lower polymorphism  
367 probability, higher variant quality score, increased posterior probability of being non-IBD, smaller  
368 distance to a recombination hotspot, and lower recombination rate. We also observed a GC bias in  
369 putative gene conversion variants, as measured by the fraction of variants containing an A->C/T->G or A-  
370 >G/T->C mutation (37% in putative gene conversions vs. 27% in all other non-IBD variants;  $P < 10^{-100}$ ;  
371 Fisher's exact test).

372

### 373 **Rescaling the site frequency spectrum with recurrent mutations**

374 With our set of high-confidence non-IBD variants, we rescaled the site frequency spectrum for very rare  
375 variants. Taking into account the power of our approach on simulated data, we plot the original and  
376 rescaled SFS for variants with allele count  $<5$  in **Figure 6A (Methods)**. Rescaling the site frequency  
377 spectrum resulted in a 3% increase in the fraction of singleton variants, from 46.6% to 49.6%. As  
378 expected, the majority of this shift is due to the relatively large fraction of CpG->T variants that were  
379 called as non-IBD (**Figure 6B**). For CpG->T variants alone, the fraction of singleton variants increased  
380 from 43.6% to 49.9%. We note that this rescaling is incomplete, as we identified non-IBD variants at only  
381 allele counts 2 to 5 (representing 38% of non-singleton variants in UK10K).

382

### 383 **Discussion**

384 We describe a novel approach designed to specifically identify non-IBD variants in whole genome  
385 sequencing data by leveraging the difference in the obligate recombination distance between rare IBD and  
386 non-IBD variants. Our approach uses a Bayesian hierarchical model and Gibbs sampling to jointly infer  
387 the TMRCA distributions of these two scenarios and identify variants with a high posterior probability of  
388 being non-IBD. In simulated data, we find that the posterior probabilities of a variant being non-IBD can  
389 discriminate between IBD and recurrent mutations for variants up to allele count 5 in a population sample  
390 of 3,621 individuals.

391 Our approach assumes that we do not have phase information for individuals, i.e. we do not  
392 assign each variant in an individual to a maternally or paternally inherited chromosome. If we had  
393 accurate phase information for rare variants, such as from long-read sequencing data, or 'hard-phase' calls  
394 from paired-end sequencing libraries, we could more accurately measure recombination breakpoints. This  
395 could potentially improve the accuracy of our method by eliminating the measurement error caused by  
396 using the obligate recombination distance.

397 We focused on identifying non-IBD variants for allele counts of 5 or less, as the performance of  
398 our method decreases with increasing allele count. Additionally, the computational burden of sampling  
399 from the marginal posterior distributions increases exponentially with increasing allele count. With a

400 larger sample size, the frequency of a variant at a given allele count will decrease, while the  
401 computational complexity remains the same. Thus, we expect that applying our method to even larger  
402 sequencing datasets will improve its performance.

403 The negative correlation we observed between local recombination rate and the probability of a  
404 site being called non-IBD suggests that our method is confounded by local recombination rate. In  
405 simulated data, we also observed that we had lower power to identify recurrent mutations in close  
406 proximity to recombination hotspots. We also note that we found a significant relationship between  
407 sequencing quality, measured by read depth and variant quality score, and the probability of a site being  
408 called non-IBD. The signature of a non-IBD variant used here could also be that of a genotyping error, as  
409 genotyping errors also may occur on any random haplotype background in a population. This could be a  
410 potential application of our method, as a way to identify genotyping errors in large scale sequencing  
411 datasets. Our current recommendation to overcome this issue is to remove variants of low quality until  
412 this relationship is not significant. However, distinguishing genotyping errors from true non-IBD variants  
413 remains an important problem.

414

## 415 **Materials and Methods**

416

### 417 **Forward genetic simulations with SLiM**

418 We used the software program SLiM version 2.5 (Haller and Messer 2017) for forward genetic  
419 simulations. We used the following European demographic model (Bhaskar et al. 2015): an ancestral  
420 population size of 10,000 with a burn-in period of 100,000 generations; a population bottleneck to 200  
421 individuals at generation 200; population size rebounds to 10,000; a second bottleneck to 500 individuals  
422 at generation 4,280; population size rebounds to 5,800; exponential growth starting at generation 4,870 at  
423 3.89% per generation; random sampling of 3,621 individuals at generation 5,000. SLiM simulations had a  
424 uniform mutation rate of  $2.5 \times 10^{-8}$  mutations per base pair per generation. We identified recurrent  
425 mutations as base positions with two or more unique mutations. We performed 1,000 simulations with  
426 uniform recombination rate of  $1 \times 10^{-8}$  events per base pair per generation, and additional 100 simulations  
427 each with recombination hotspots of  $r = 5 \times 10^{-6}$ ,  $1 \times 10^{-6}$ , or  $5 \times 10^{-7}$ . Each 10Mb simulated genomic segment  
428 had two hotspots of length 10,000 bp flanking the central 2Mb of the segment.

429 For forward genetic simulations with selection, we generated 10Mb genomic segments using a  
430 recipe from the SLiM manual (Haller and Messer 2017) with the following procedure: 1) sample non-  
431 coding region; 2) sample exon; 3) sample intron and exon pairs in a loop with 20% probability of  
432 stopping after each pair; 4) repeat steps 1-3 while chromosome length  $< 10\text{Mb}$ ; 5) sample final non-  
433 coding region. Exonic mutations were synonymous or non-synonymous at a ratio of 1:2.31, and 10% of

434 non-synonymous mutations were neutral. Deleterious non-synonymous mutations' selection coefficients  
435 were sampled from a gamma distribution with mean -0.03 and shape 0.207. Exon lengths were sampled  
436 from a lognormal distribution with mean  $\log(50)$  and standard deviation  $\log(2)$ . Non-coding regions were  
437 neutral and their lengths were sampled from a uniform distribution between 100 and 5000. Intronic  
438 mutations were neutral and intron lengths were sampled from a lognormal distribution with mean  
439  $\log(100)$  and standard deviation  $\log(1.5)$ .

440

#### 441 **UK10K dataset**

442 We applied our method to identify recurrent mutations in whole-genome sequencing data in 3,621  
443 individuals from the UK10K project (Walter et al. 2015). These individuals were sequenced to average  
444 depth 7x, passed the UK10K project quality control filters, and come from the ALSPAC and TWINSUK  
445 studies. We measured the recombination distance for biallelic and multiallelic single nucleotide variants  
446 that passed the UK10K quality filters that were present at allele count  $\leq 10$  in these individuals.

447

#### 448 **Measuring the obligate recombination distance**

449 For simulated data, we generated diploid genotypes by randomly combining pairs of haploid genomes,  
450 and calculated the recombination distances for variants within the central 2Mb of each 10Mb genomic  
451 segment. In both simulated and UK10K data, we measured the obligate recombination distances for  
452 variants with allele count  $\leq 10$ . For each pair of carriers, we identified the nearest variant upstream and  
453 downstream with opposite homozygote genotype, i.e. where one individual has genotype 0 and the other  
454 has genotype 2 (**Supplementary Figure 3**). We then converted the physical distance to a genetic distance  
455 using a genetic map. For UK10K, we used a 1000 Genomes Project CEU genetic map (The 1000  
456 Genomes Project Consortium 2012), and for simulated data we used a uniform map with  $r = 1 \times 10^{-8}$  events  
457 per site per generation, or a variable map for simulations including recombination hotspots.

458

#### 459 **Applying the Bayesian hierarchical model**

460 To apply our model to simulated or UK10K recombination distances, we first generated an estimate of the  
461 beta parameter for non-IBD variants from multiallelic sites. Using Gibbs sampling on non-IBD allele  
462 pairs from multiallelic variants, we used a simplified version of the hierarchical model where we sampled  
463 the TMRCA for each allele pair and the beta parameter in each Gibbs iteration. We repeated this  
464 procedure to estimate beta for a range of alpha values from multiallelic sites' recombination distances. To  
465 test if the choice of alpha affected our ability to discriminate IBD and non-IBD variants, we applied the  
466 model with different non-IBD alpha/beta values to UK10K variants on chromosome 22. The posterior  
467 estimates of k were highly correlated across values of alpha (alpha=20 vs. alpha=40, **Supplementary**



468 **Table 7**). When applying the full model to data, we used  $\alpha = 10$  for IBD allele pairs, with  $\alpha = 40$   
469 and the corresponding value of  $\beta$  inferred from multi-allelic sites ( $\beta = 0.0859$ ) for non-IBD allele  
470 pairs. We ran 10,000 iterations of the Gibbs sampler for each run of the model, thinned the chains until  
471 autocorrelation was below 0.01, and assessed convergence of the chains by comparing the thinned  
472 samples from the first and second half of the chain via a Wilcoxon rank-sum test. A chain was determined  
473 to have converged if the Wilcoxon test P-value was  $> 0.05$ .

474 We parallelized the application of our model by breaking down the genome into 10Mb segments,  
475 rather than including all variants of a given allele count in a single run of the Gibbs sampler. To test the  
476 effect of the number of variants included in a Gibbs sampling run, we applied the model to 10Mb  
477 segments on chromosome 22 and to all variants on chromosome 22 together. For smaller allele counts  
478 with thousands of variants in each segment, we observed no effect, but for larger allele counts we did see  
479 an effect of applying the model to small numbers of variants. Thus, for allele counts  $> 5$ , we grouped  
480 segments together until at least 1000 variants were included in each run of the model.

481

#### 482 **Variant age estimation with *runtc***

483 The *runtc* software was downloaded from <https://github.com/jaredgk/runtc> (Platt et al. 2019). The output  
484 from 100 simulations from SLiM with uniform recombination and mutation rates was converted to VCF  
485 format, and then *runtc* was applied to the vcf files with the commands `--k-range 2 10 --rec 1e-8 --mut`  
486 `2.5e-8`.

487

#### 488 **Area under the ROC curve (AUC)**

489 For all ROC curves from simulated data, we calculated the area under the curve as:

$$AUC = \frac{\sum_1^r \sum_1^i 1_{q_i > q_r}}{r * i}$$

490 where  $r$  and  $i$  represent recurrent and IBD variants, and  $q_r$  and  $q_i$  the values of the statistic being  
491 evaluated. For each AUC, we calculated a confidence interval by generating 10,000 bootstrap samples of  
492 5,000 variants (with the same ratio of IBD:recurrent variants as the simulated sample). We then sorted the  
493 10,000 AUC estimates and took the 2.5th and 97.5th percentiles to get a 95% confidence interval.

494

#### 495 **Calculating an expected fraction of recurrent mutations from polymorphism probabilities**

496 As a proxy for the mutation rate, we estimated the polymorphism probability for 5-mer sequence contexts  
497 (i.e., the focal base and two bases up and downstream) as the fraction of sites with that context that were  
498 variable in the UK10K dataset. These polymorphism probabilities were highly correlated with those  
499 calculated previously with the 1000 Genomes dataset (Aggarwala and Voight 2016) (Pearson's

500 correlation = 0.99,  $P < 10^{-100}$ ), with a higher fraction of polymorphic sites in the UK10K for each context  
501 due to the larger sample size (**Supplementary Figure 5**).

502 To predict the fraction of sites that should be called recurrent based on sequence context  
503 polymorphism probabilities, we used a simple Poisson model of mutation. With the polymorphism  
504 probability for a context as the Poisson rate parameter  $\lambda$  and the number of mutations at a site  $H$ , the  
505 probability of a recurrent mutation is the probability of two or more mutations at a site:

$$P(\text{recurrent}) = P(H \geq 2) = 1 - e^{-\lambda} - \lambda e^{-\lambda} \quad (21)$$

506  
507 As we are only considering sites where there has been at least one mutation event, i.e. polymorphic sites,  
508 the probability of a recurrent mutation at a site is then:

$$P(H \geq 2 | H \geq 1) = \frac{P(H \geq 2)}{P(H \geq 1)} \quad (22)$$

509  
510 We calculated this probability for each 5-mer sequence context. We then calculated the expected fraction  
511 by scaling the overall fraction of sites called non-IBD by each context's probability of a recurrent  
512 mutation, relative to all the other contexts.

513 We used 5-mer sequence contexts for this analysis so that we would have a reasonable number of  
514 variants classified as IBD or not for each sequence context. If we had used 7-mer sequence contexts,  
515 some contexts would have too few variants to calculate the proportion called non-IBD. For the regression  
516 models to predict non-IBD variants using multiple genomic annotations, we used 7-mer sequence  
517 contexts, as there is significant mutation rate variation even within 5-mer contexts (Aggarwala and Voight  
518 2016).

519

## 520 **Identifying putative gene conversions**

521 Within the set of variants called as non-IBD, we called putative gene conversion tracts that contained 2 or  
522 more variants that were: 1) present in the same individuals, 2) at the same allele count, 3) within 1kb of  
523 each other.

524

## 525 **Genomic annotation datasets**

526 We used the B statistic (McVicker et al. 2009) (downloaded from  
527 <http://www.phrap.org/othersoftware.html>) to measure background selection, which estimates the  
528 proportion of neutral variation in a region. VQSLOD and read depth were extracted from the UK10K  
529 VCF files. We used a recombination rate map estimated for Europeans from the 1000 Genomes Project,  
530 downloaded from  
531 [http://ftp.1000genomes.ebi.ac.uk/vol1/ftp/technical/working/20130507\\_omni\\_recombination\\_rates](http://ftp.1000genomes.ebi.ac.uk/vol1/ftp/technical/working/20130507_omni_recombination_rates) (The

532 1000 Genomes Project Consortium 2012). We used human recombination hotspots identified in the  
533 HapMap project (The International Hapmap Consortium 2007), and downloaded from  
534 [https://github.com/auton1/Campbell\\_et\\_al](https://github.com/auton1/Campbell_et_al). Replication timing data was obtained from (Koren et al.  
535 2012). CpG methylation levels were downloaded from <https://www.ncbi.nlm.nih.gov/geo/> using  
536 accession numbers GSM1010980 (ovary), and GSM1127119 (testis).

537

### 538 **Rescaling the SFS with non-IBD mutations**

539 Starting with the SFS calculated from all UK10K biallelic sites included in our study, for allele counts 2-5  
540 for CpG->T and all other mutation types we calculated the fraction called as non-IBD. We then divided  
541 this fraction by the power of our method, estimated by the percent of multiallelic sites identified as non-  
542 IBD at the chosen posterior threshold. From this fraction of non-IBD sites for the two mutation types, we  
543 apportioned the non-IBD mutations into lower allele counts based on the relative frequency of allele  
544 counts 1-5. For example, to determine what fraction of non-IBD 4-ton variants would be assigned  
545 partition 1:3 vs. 2:2, we used the relative frequencies:

$$f_{1:3} = \frac{f_1 f_3}{f_1 f_3 + f_2 f_2}; f_{2:2} = \frac{f_2 f_2}{f_1 f_3 + f_2 f_2}$$

546

547 Where  $f_{1:3}$  is the relative frequency of the 1:3 partition, and  $f_1$  is the frequency of singletons in the  
548 original SFS. In the rescaled SFS, the number of singletons increased by the number of variants of allele  
549 count 2-5 that were identified with partition 1:(n-1); the number of doubletons decreased by the number  
550 of doubletons that were identified as recurrent, and increased by the number of variants of allele count 3-5  
551 that had partition 2:(n-2); and so on through allele count 4. Allele count 5 was excluded from the rescaled  
552 SFS plots because we did not identify recurrent variants at allele counts greater than 5.

553

554

### 555 **Acknowledgements**

556 This work was supported by the US National Institutes of Health (grant numbers DK101478 to B.F.V.  
557 and T32 GM008216 for K.E.J.) and a Linda Pechenik Montague Investigator award (to B.F.V.). This  
558 study makes use of data generated by the UK10K Consortium, derived from samples from ALSPAC and  
559 TWINSUK. A full list of the investigators who contributed to the generation of the data is available from  
560 [www.UK10K.org](http://www.UK10K.org). Funding for UK10K was provided by the Wellcome Trust under award WT091310.

561

### 562 **Statement of Work**

563 K.E.J. and B.F.V. conceived of the experiments, designed the methodology, analyzed the data, and wrote  
564 the manuscript. B.F.V. supervised the work.

565

566 **Statement of Competing Interest**

567 The authors declare no competing interest.

568

569 **Data availability**

570 The Gibbs sampler for the Bayesian hierarchical model is available as an R package at  
571 [github.com/kelsj/ibdibsR](https://github.com/kelsj/ibdibsR). The hierarchical model input data (pairwise obligate recombination distances)  
572 and output (posterior probabilities) from simulations and UK10K are available at  
573 [http://coruscant.itmat.upenn.edu/data/Johnson\\_Voight\\_Sims\\_UK10K\\_PP\\_nonIBD.tar.gz](http://coruscant.itmat.upenn.edu/data/Johnson_Voight_Sims_UK10K_PP_nonIBD.tar.gz).

574 **Bibliography**

- 575
- 576 Aggarwala V, Voight BF. 2016. An expanded sequence context model broadly explains variability in  
577 polymorphism levels across the human genome. *Nat. Genet.* 48:349–355.
- 578 Albers PK, McVean G. 2020. Dating genomic variants and shared ancestry in population-scale  
579 sequencing data. *PLoS Biol.* 18:e3000586.
- 580 Arndt PF, Hwa T, Petrov DA. 2005. Substantial Regional Variation in Substitution Rates in the Human  
581 Genome: Importance of GC Content, Gene Density, and Telomere-Specific Effects. *J. Mol. Evol.*  
582 60:748–763.
- 583 Bhaskar A, Wang YXR, Song YS. 2015. Efficient inference of population size histories and locus-  
584 specific mutation rates from large-sample genomic variation data. *Genome Res.*:268–279.
- 585 Excoffier L, Dupanloup I, Huerta-Sánchez E, Sousa VC, Foll M. 2013. Robust Demographic Inference  
586 from Genomic and SNP Data. *PLoS Genet.* 9.
- 587 Francioli LC, Polak PP, Koren A, Menelaou A, Chun S, Renkens I, Van Duijn CM, Swertz M, Wijmenga  
588 C, Van Ommen G, et al. 2015. Genome-wide patterns and properties of de novo mutations in  
589 humans. *Nat. Genet.* 47:822–826.
- 590 Gutenkunst RN, Hernandez RD, Williamson SH, Bustamante CD. 2009. Inferring the joint demographic  
591 history of multiple populations from multidimensional SNP frequency data. *PLoS Genet.* 5.
- 592 Haldane JBS. 1919. The combination of linkage values and the calculation of distances between the loci  
593 of linked factors. *J. Genet.* 8:229–309.
- 594 Haldane JBS. 1933. The Part Played by Recurrent Mutation in Evolution. *Am. Nat.* 67:5–19.
- 595 Halldorsson B V., Hardarson MT, Kehr B, Styrkarsdottir U, Gylfason A, Thorleifsson G, Zink F,  
596 Jonasdottir Adalbjorg, Jonasdottir Aslaug, Sulem P, et al. 2016. The rate of meiotic gene conversion  
597 varies by sex and age. *Nat. Genet.* 48:1377–1384.
- 598 Haller BC, Messer PW. 2017. SLiM 2: Flexible, interactive forward genetic simulations. *Mol. Biol. Evol.*  
599 34:230–240.
- 600 Harpak A, Bhaskar A, Pritchard JK. 2016. Mutation Rate Variation is a Primary Determinant of the  
601 Distribution of Allele Frequencies in Humans. Eyre-Walker A, editor. *PLOS Genet.* 12:e1006489.
- 602 Jenkins PA, Mueller JW, Song YS. 2014. General triallelic frequency spectrum under demographic  
603 models with variable population size. *Genetics* 196:295–311.
- 604 Jenkins PA, Song YS. 2011. The effect of recurrent mutation on the frequency spectrum of a segregating  
605 site and the age of an allele. *Theor. Popul. Biol.* 80:158–173.
- 606 Jouganous J, Long W, Ragsdale AP, Gravel S. 2017. Inferring the joint demographic history of multiple  
607 populations: Beyond the diffusion approximation. *Genetics* 206:1549–1567.
- 608 Kelleher J, Wong Y, Wohns AW, Fadil C, Albers PK, McVean G. 2019. Inferring whole-genome  
609 histories in large population datasets. *Nat. Genet.* 51:1330–1338.
- 610 Kirby A, Gnirke A, Jaffe DB, Barešová V, Pochet N, Blumenstiel B, Ye C, Aird D, Stevens C, Robinson  
611 JT, et al. 2013. Mutations causing medullary cystic kidney disease type 1 lie in a large VNTR in

- 612 MUC1 missed by massively parallel sequencing. *Nat. Genet.* 45:299–303.
- 613 Koren A, Polak P, Nemesh J, Michaelson JJ, Sebat J, Sunyaev SR, McCarroll SA. 2012. Differential  
614 relationship of DNA replication timing to different forms of human mutation and variation. *Am. J.*  
615 *Hum. Genet.* 91:1033–1040.
- 616 Lek M, Karczewski KJ, Minikel E V., Samocha KE, Banks E, Fennell T, O’Donnell-Luria AH, Ware JS,  
617 Hill AJ, Cummings BB, et al. 2016. Analysis of protein-coding genetic variation in 60,706 humans.  
618 *Nature* 536:285–291.
- 619 Lukic S, Hey J. 2012. Demographic inference using spectral methods on SNP data, with an analysis of the  
620 human out-of-Africa expansion. *Genetics* 192:619–639.
- 621 Mathieson I, McVean G. 2014. Demography and the age of rare variants. *PLoS Genet.* 10:e1004528.
- 622 McVicker G, Gordon D, Davis C, Green P. 2009. Widespread genomic signatures of natural selection in  
623 hominid evolution. *PLoS Genet.* 5.
- 624 Nicolae DL. 2016. Association Tests for Rare Variants. *Annu. Rev. Genomics Hum. Genet.* 17:117–130.
- 625 O’Roak BJ, Stessman HA, Boyle EA, Witherspoon KT, Martin B, Lee C, Vives L, Baker C, Hiatt JB,  
626 Nickerson DA, et al. 2014. Recurrent de novo mutations implicate novel genes underlying simplex  
627 autism risk. *Nat. Commun.* 5:5595.
- 628 Pagnier J, Mears JG, Dunda-Belkhodja O, Schaefer-Rego KE, Beldjord C, Nagel RL, Labie D. 1984.  
629 Evidence for the multicentric origin of the sickle cell hemoglobin gene in Africa. *Proc. Natl. Acad.*  
630 *Sci.* 81:1771–1773.
- 631 Palamara PF, Francioli LC, Wilton PR, Genovese G, Gusev A, Finucane HK, Sankararaman S, Sunyaev  
632 SR, De Bakker PIW, Wakeley J, et al. 2015. Leveraging Distant Relatedness to Quantify Human  
633 Mutation and Gene-Conversion Rates. *Am. J. Hum. Genet.* 97:775–789.
- 634 Palamara PF, Lencz T, Darvasi A, Pe’er I. 2012. Length distributions of identity by descent reveal fine-  
635 scale demographic history. *Am. J. Hum. Genet.* 91:809–822.
- 636 Platt A, Pivrotto A, Knoblauch J, Hey J. 2019. An estimator of first coalescent time reveals selection on  
637 young variants and large heterogeneity in rare allele ages among human populations. *PLOS Genet.*  
638 15:e1008340.
- 639 Ragsdale AP, Coffman AJ, Hsieh P, Struck TJ, Gutenkunst RN. 2016. Triallelic population genomics for  
640 inferring correlated fitness effects of same site nonsynonymous mutations. *Genetics* 203:513–523.
- 641 Speidel L, Forest M, Shi S, Myers SR. 2019. A method for genome-wide genealogy estimation for  
642 thousands of samples. *Nat. Genet.* 51:1321–1329.
- 643 The 1000 Genomes Project Consortium. 2012. An integrated map of genetic variation from 1,092 human  
644 genomes. *Nature* 491:56–65.
- 645 The International Hapmap Consortium. 2007. A second generation human haplotype map of over 3.1  
646 million SNPs. *Nature* 449:851–861.
- 647 Walter K, Min JL, Huang J, Crooks L, Memari Y, McCarthy S, Perry JRB, Xu C, Futema M, Lawson D,  
648 et al. 2015. The UK10K project identifies rare variants in health and disease. *Nature* 526:82–90.

649 Wright S. 1931. Evolution in Mendelian Populations. *Genetics* 16:97–159.

650 Wright S. 1937. The Distribution of Gene Frequencies in Populations. *Proc. Natl. Acad. Sci.* 23:307–320.

651

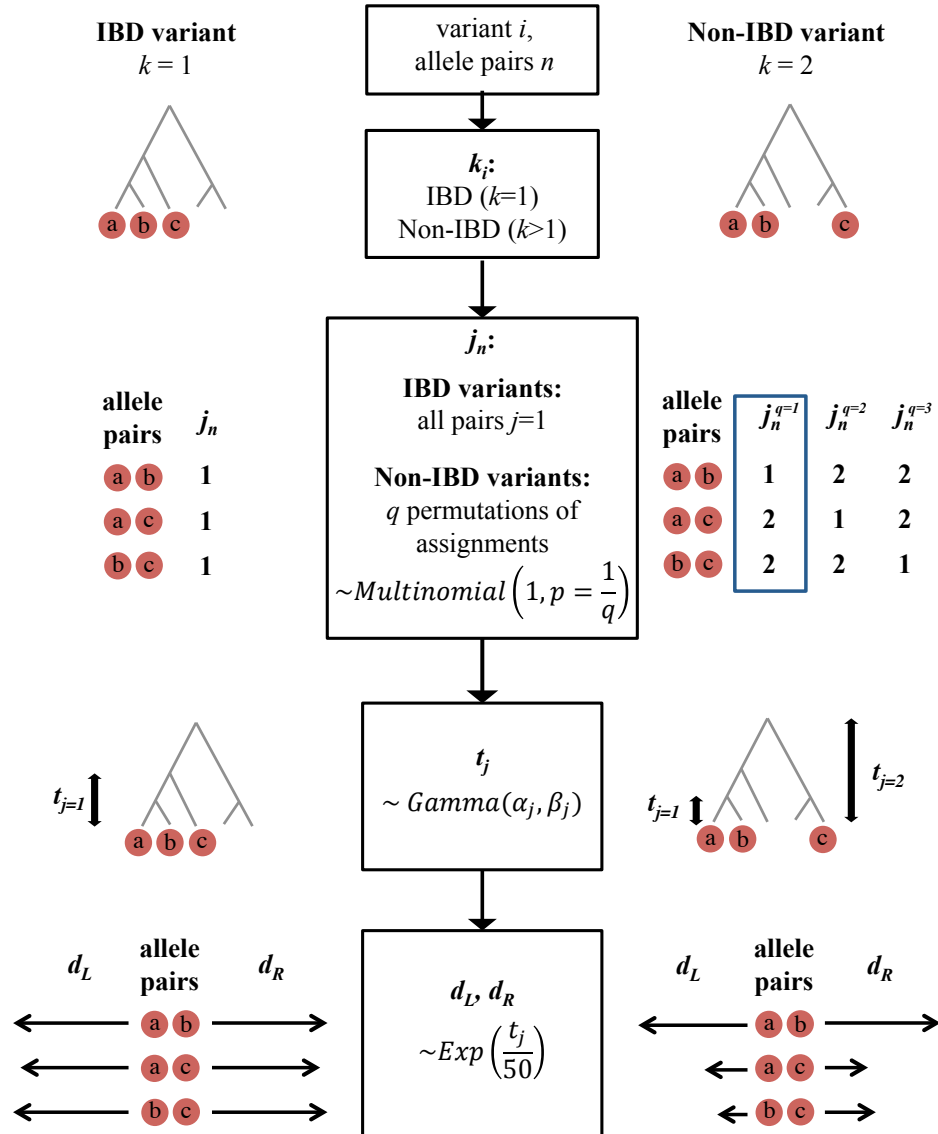

652

653 **Figure 1.** The generative model underlying our Bayesian hierarchical model to distinguish IBD and non-

654 IBD variants. Each variant  $i$  has  $n$  allele pairs;  $k$ : variant assignment to IBD ( $k=1$ ) or non-IBD ( $k>1$ );  $j_n$ :

655 allele pair assignments (IBD:  $j_n=1$ , non-IBD:  $j_n=2$ );  $q$ : all possible permutations of  $j_n$  assignments for a

656 given non-IBD variant partition;  $t_j$ : within a variant, IBD allele pairs or non-IBD allele pairs' TMRCA's;

657  $d$ : allele pairwise recombination distances to the right ( $d_R$ ) and left ( $d_L$ ).

658



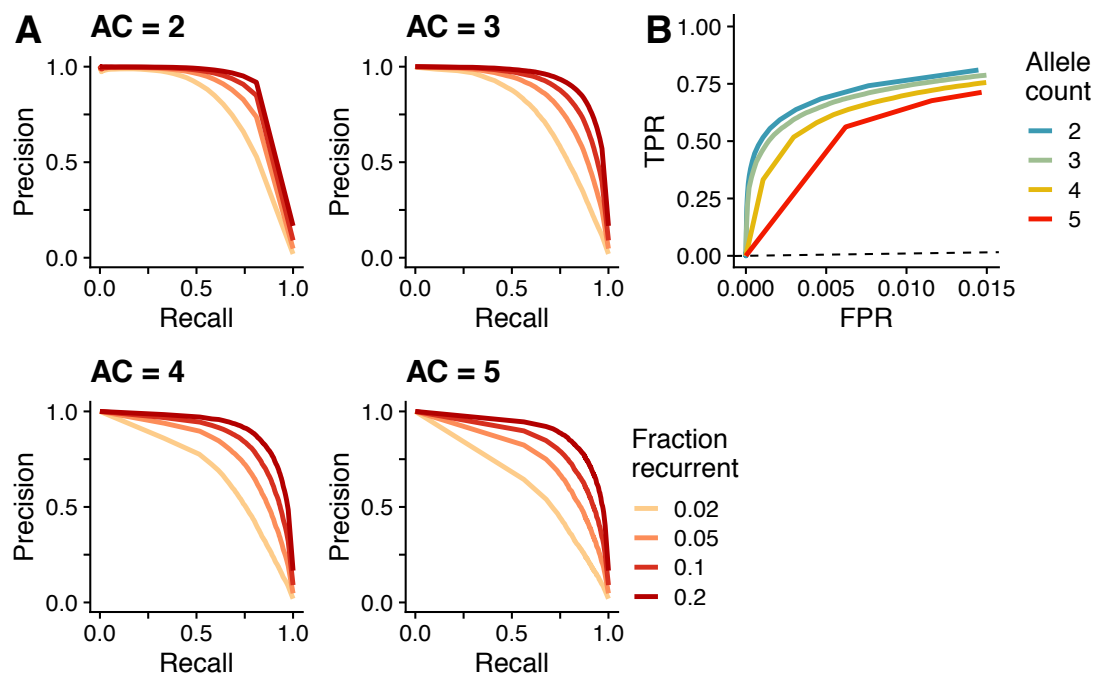

659

660 **Figure 2. (A)** Precision-recall plots and **(B)** ROC plots for the Bayesian hierarchical model applied to  
661 distinguish recurrent and IBD variants in simulated data. In **A**, each panel represents the application to  
662 variants of a given allele count (AC). In **B**, the dashed line represents the identity line.

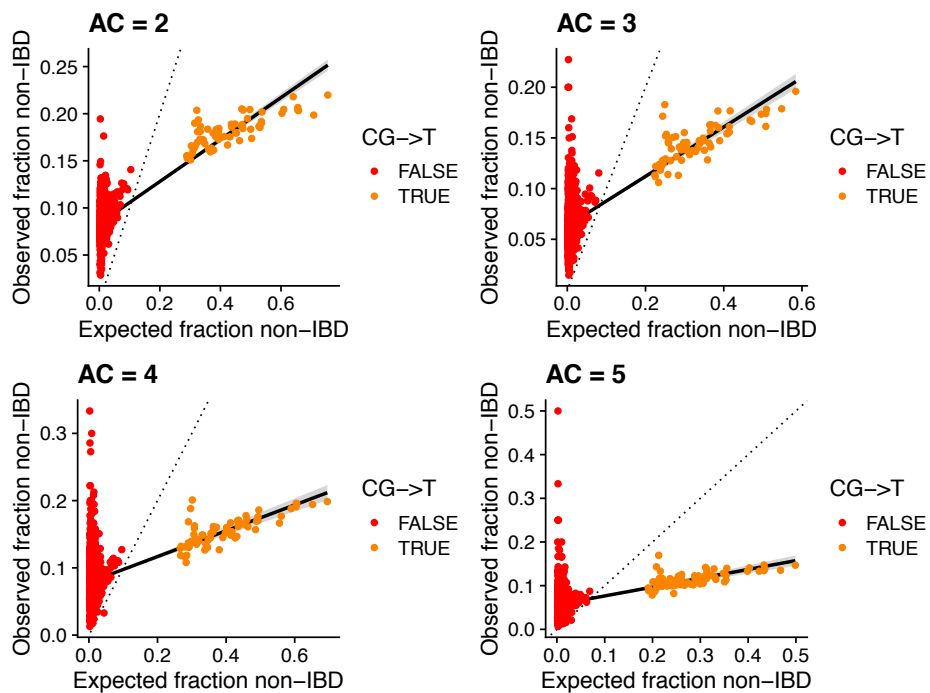

663

664 **Figure 3.** The expected and observed fraction of sites called non-IBD for UK10K variants. Each dot  
665 represents a 5-mer sequence context. The expected fraction was calculated from each sequence context's  
666 polymorphism probability. The solid black line is a linear regression line for all sequence contexts, and  
667 the dotted line is the identity line.

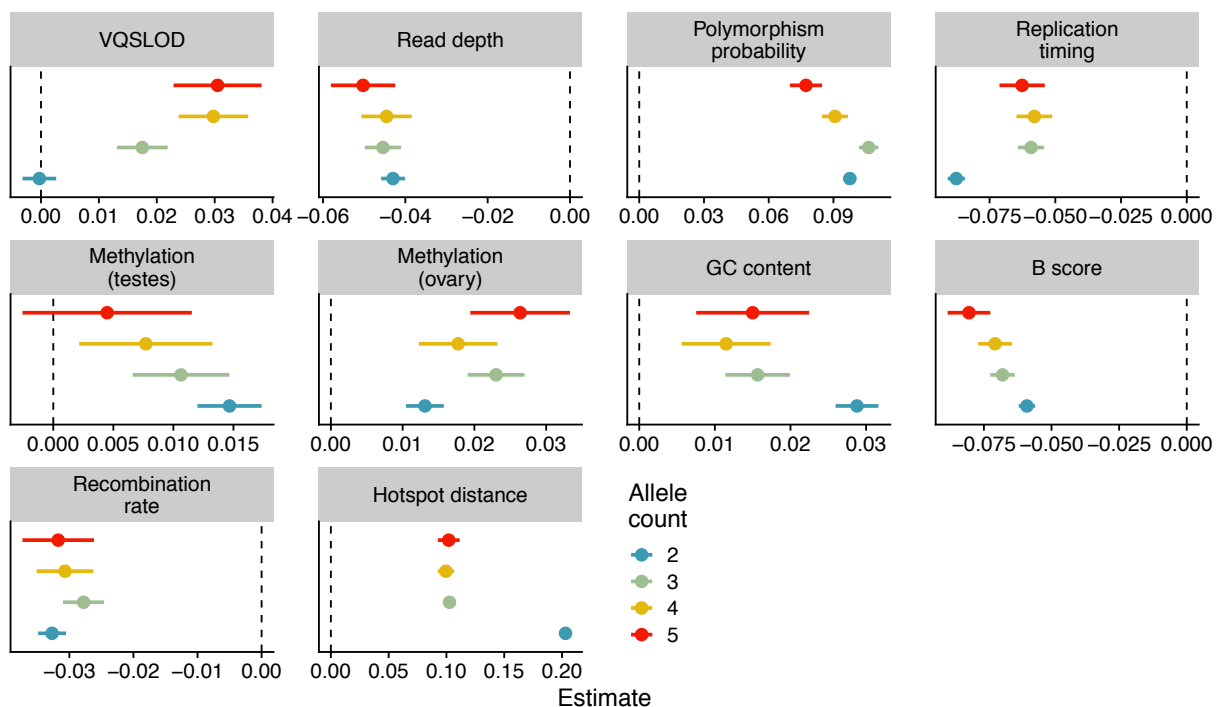

668  
669 **Figure 4.** Linear regression of genomic annotations (predictor variables) vs. posterior probability of being  
670 non-IBD (outcome) for all variant sites, grouped by allele count. Dot colors represent allele count, and a  
671 separate regression was run for variants of each allele count. Each dot's position denotes its beta  
672 coefficient estimate, with error bars representing  $\beta \pm 1.96 \times \text{standard error}$ . The vertical dashed line  
673 represents a beta estimate of zero. Hotspot distance: physical distance to nearest recombination hotspot z-  
674 score; Recombination rate: local recombination rate z-score; B score: McVicker's B statistic z-score;  
675 Replication timing: replication timing z-score; GC content: local GC content z-score; Methylation  
676 (ovary): ovary CpG methylation z-score; Methylation (testes): testes CpG methylation z-score; Read  
677 depth: read depth z-score; VQSLOD: variant quality z-score.  
678

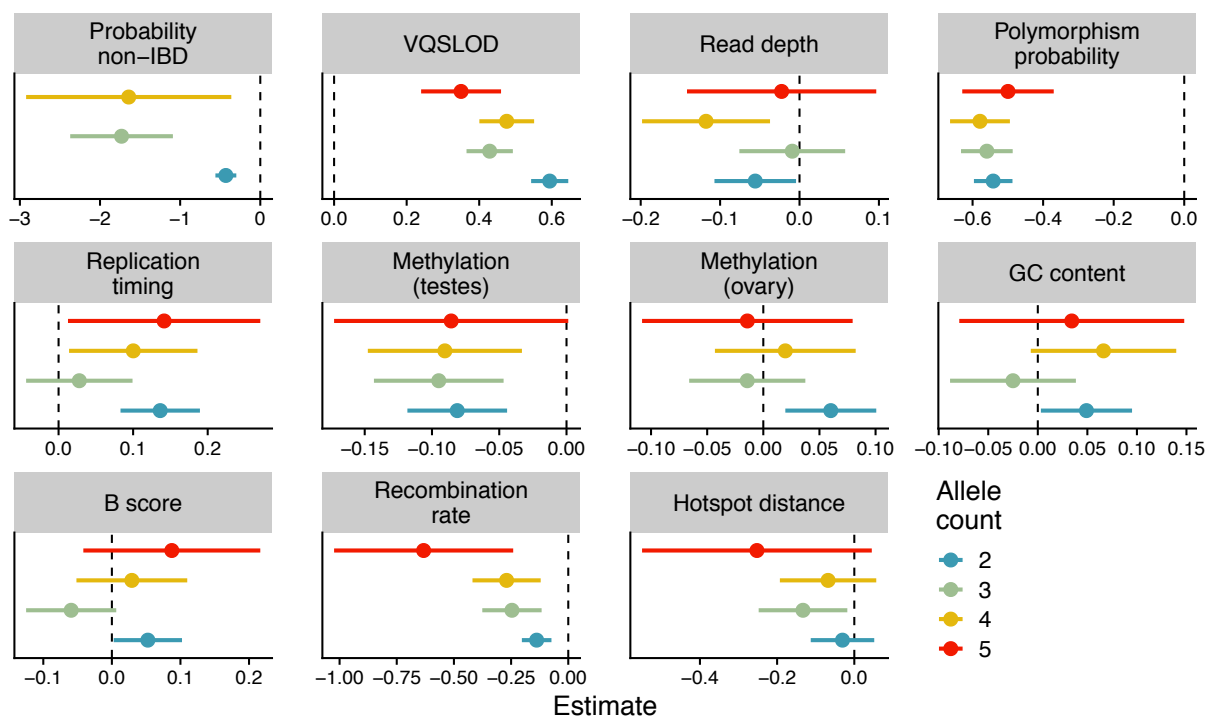

679  
 680 **Figure 5.** Results of a logistic regression using genomic annotations to distinguish putative gene  
 681 conversions from other non-IBD variants. Separate regressions were performed for variants of each allele  
 682 count. The annotation of variants' probability of being non-IBD for allele count 5 was left off to improve  
 683 the visualization (Estimate: -7.0; 95% CI: -16.4 - 2.4). Dot colors represent allele count. Each dot's  
 684 position denotes its beta coefficient estimate, with error bars representing the 95% confidence interval  
 685 ( $\text{beta} \pm 1.96 \times \text{standard error}$ ). The vertical dashed line represents a beta estimate of zero. Hotspot distance:  
 686 physical distance to nearest recombination hotspot z-score; Recombination rate: local recombination rate  
 687 z-score; B score: McVicker's B statistic z-score; Replication timing: replication timing z-score; GC  
 688 content: local GC content z-score; Methylation (ovary): ovary CpG methylation z-score; Methylation  
 689 (testes): testes CpG methylation z-score; Read depth: read depth z-score; VQSLOD: variant quality z-  
 690 score; Probability non-IBD: posterior probability of variant being non-IBD.

691

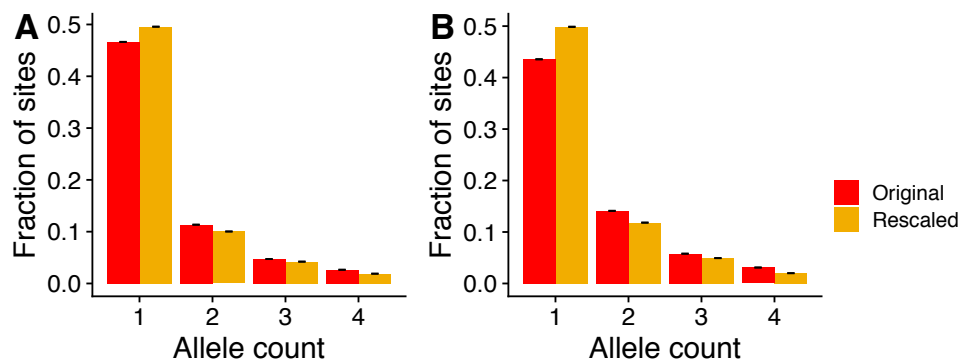

692

693 **Figure 6.** The site frequency spectrum for variants of allele count <5, before and after rescaling to  
694 incorporate non-IBD variants. **(A)** The original and rescaled SFS for all variants. **(B)** The original and  
695 rescaled SFS for CpG->T variants only.
